# Supplementary material for: Learning recurrent dynamics in spiking networks
Source: eLife journal article supplement (doi:10.7554/elife.37124), 2018-09-20
Supplement: supp [file elife-37124-supp-v1.zip]

Archive with 6 entries (6 files):
- elife_poa_e37124_Figure_3_Figure_Supplement_2.pdf
- elife_poa_e37124_Figure_1_Figure_Supplement_2.pdf
- elife_poa_e37124_Transparent_Reporting_File.pdf
- elife_poa_e37124_Figure_3_Figure_Supplement_3.pdf
- elife_poa_e37124_Figure_3_Figure_Supplement_1.pdf
- elife_poa_e37124_Figure_1_Figure_Supplement_1.pdf
