# Supplementary figures and images for: Learning recurrent dynamics in spiking networks
Source: eLife journal article supplement (doi:10.7554/elife.37124), 2018-09-20

a

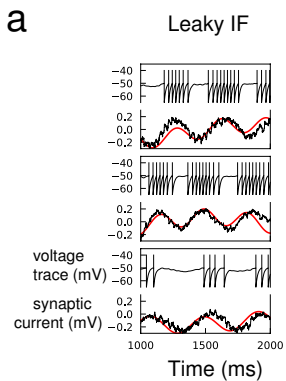

b

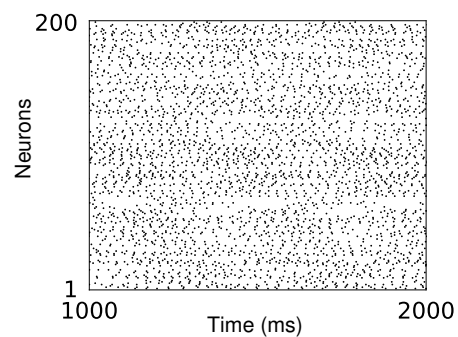

c

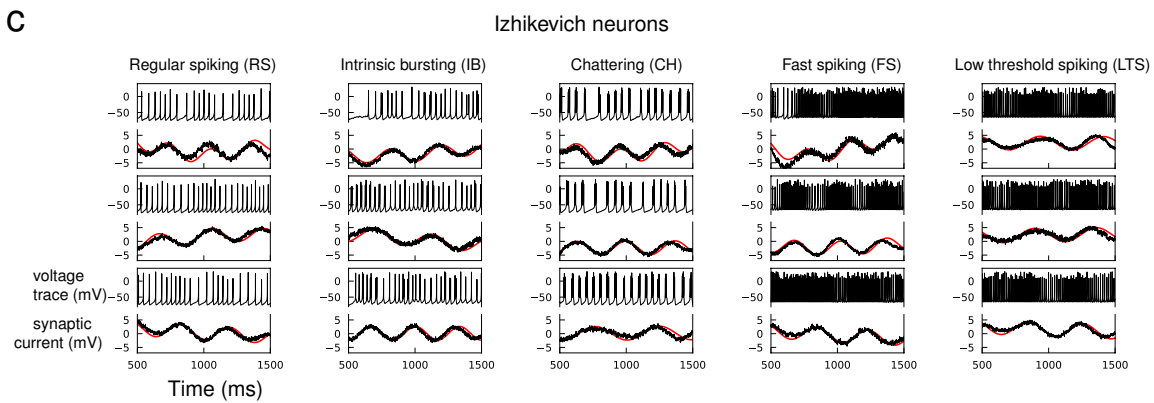

d

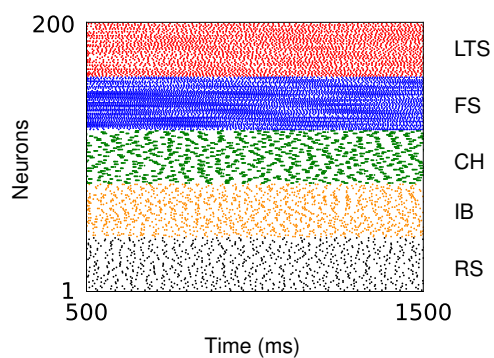

Supplement: supp [file elife-37124-supp-v1.zip › elife_poa_e37124_Figure_3_Figure_Supplement_2.pdf]

a

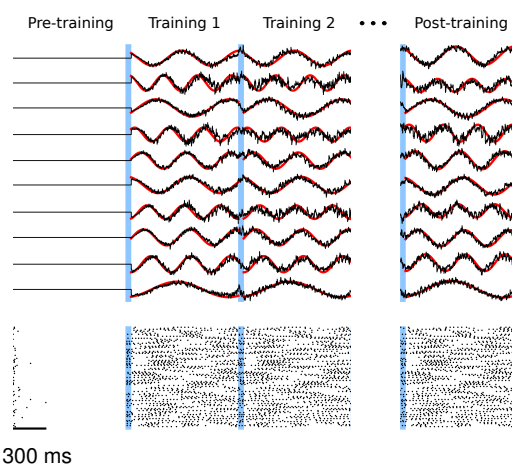

b

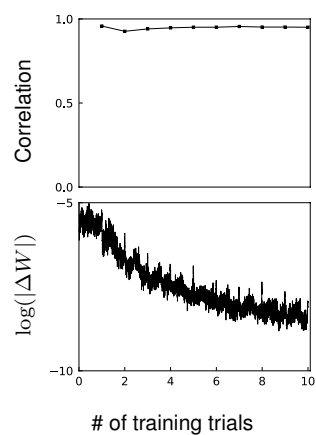

c

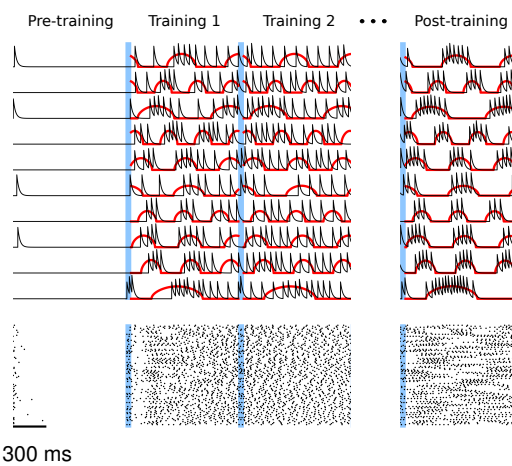

d

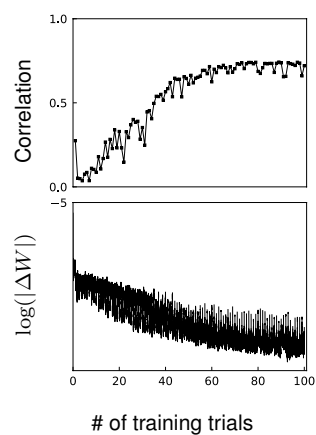

Supplement: supp [file elife-37124-supp-v1.zip › elife_poa_e37124_Figure_1_Figure_Supplement_2.pdf]

**a** Low noise

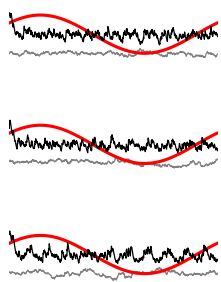

**b** Med. noise

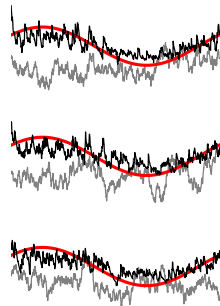

**c** High noise

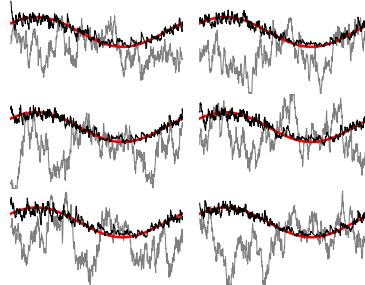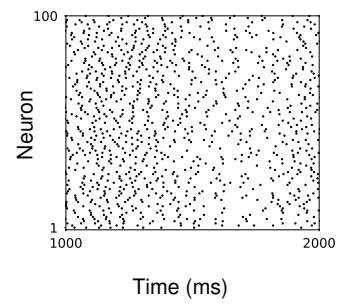

Supplement: supp [file elife-37124-supp-v1.zip › elife_poa_e37124_Figure_3_Figure_Supplement_3.pdf]

a

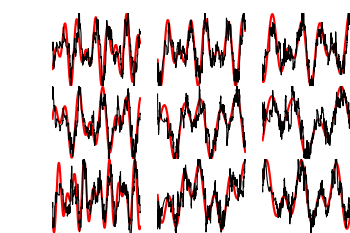

Population rate: 2.8 Hz

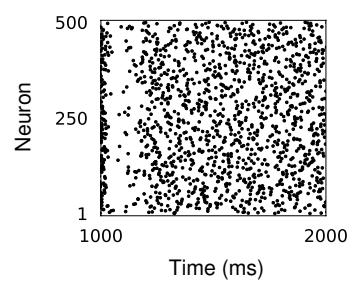

b

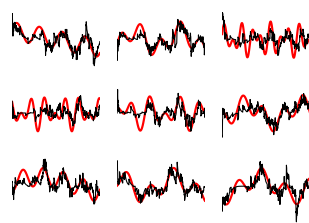

Population rate: 1.5 Hz

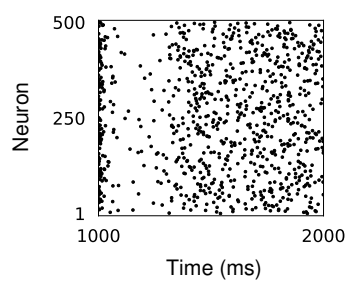

c

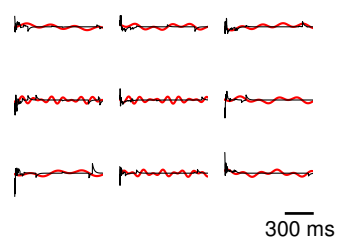

Population rate: 0.01 Hz

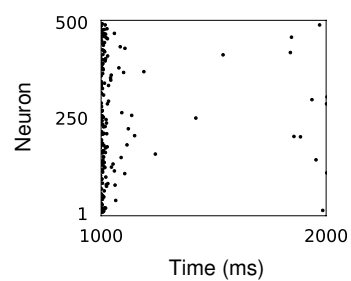

Supplement: supp [file elife-37124-supp-v1.zip › elife_poa_e37124_Figure_3_Figure_Supplement_1.pdf]

a

Pre-training

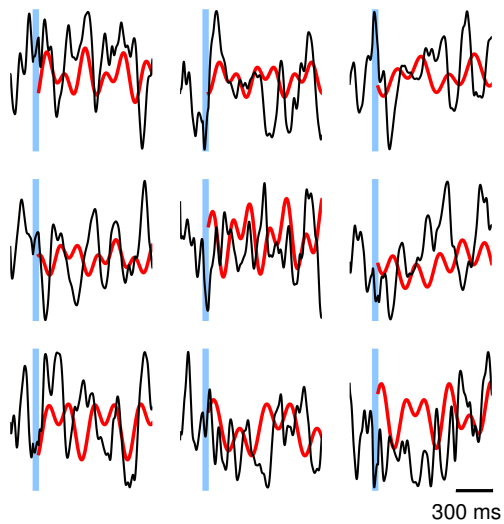

b

Post-training

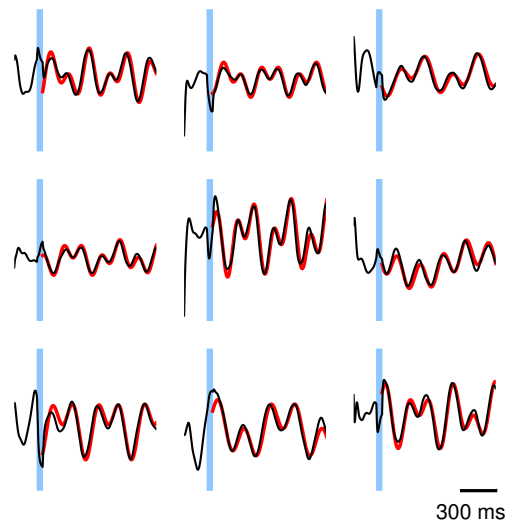

Supplement: supp [file elife-37124-supp-v1.zip › elife_poa_e37124_Figure_1_Figure_Supplement_1.pdf]
